# Supplementary material for: FCHSD2 controls oncogenic ERK1/2 signaling outcome by regulating endocytic trafficking
Source: PubMed Central journal article supplement (PMC7390455; doi:10.1371/journal.pbio.3000778), 2020-07-17

# Full gel image of western blotting

## Related to Fig 1A

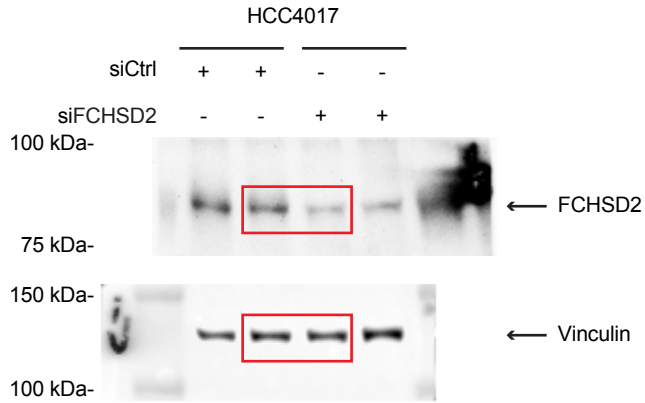

## Related to Fig 1F

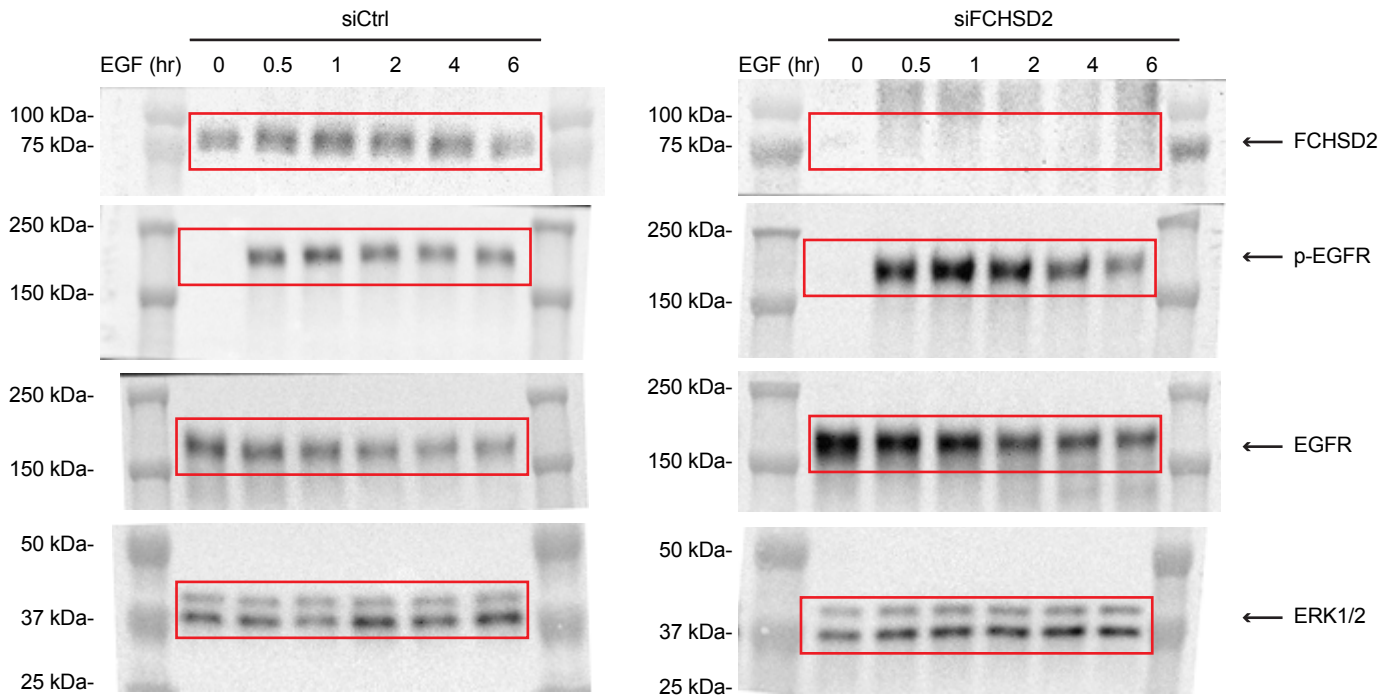

Related to Fig 2B

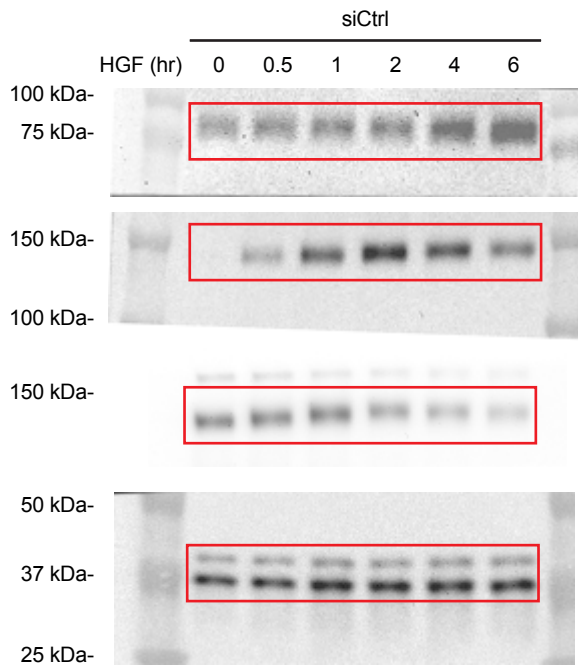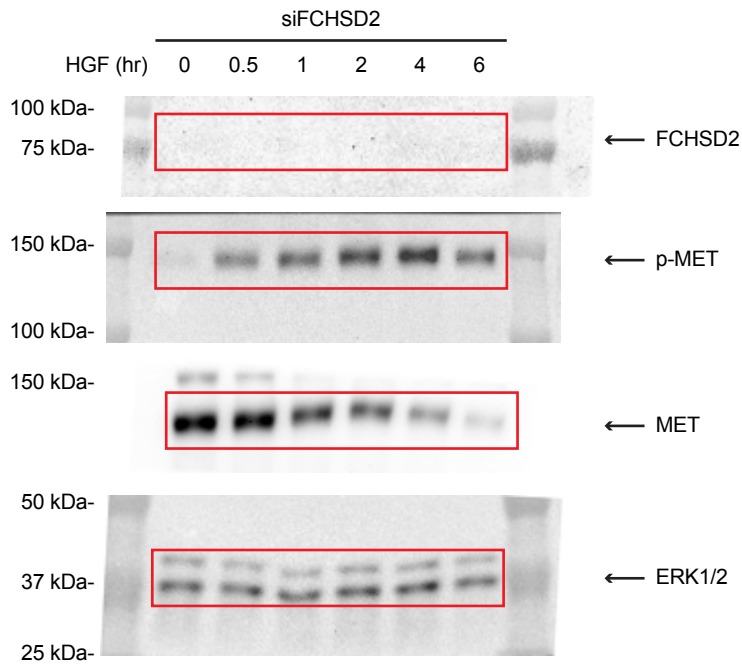

**Related to Fig 3B**

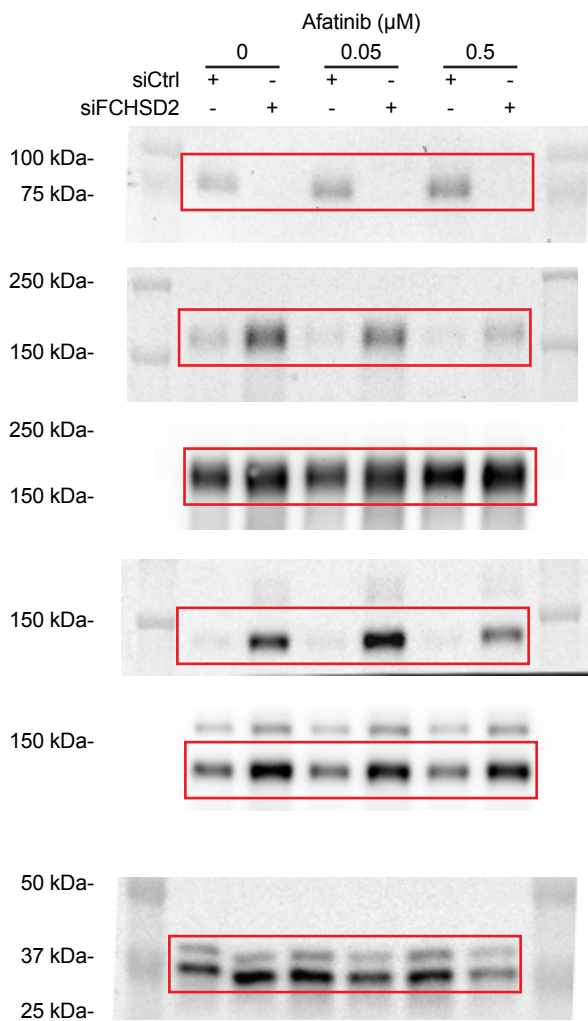

**HCC4017**

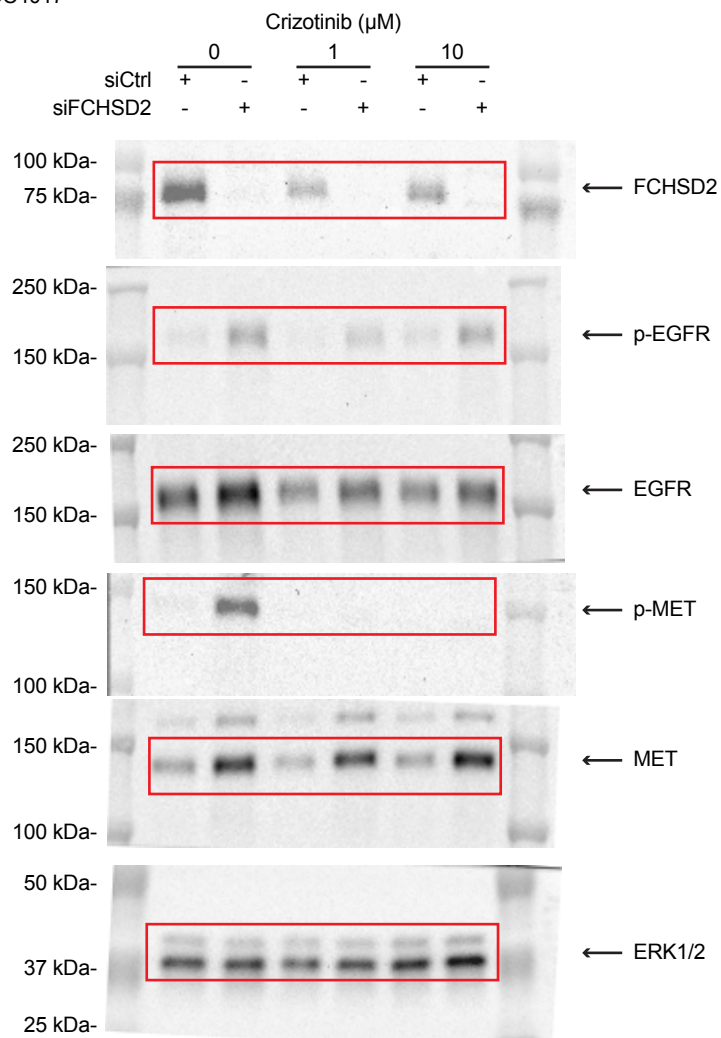

**Related to Fig 3D**

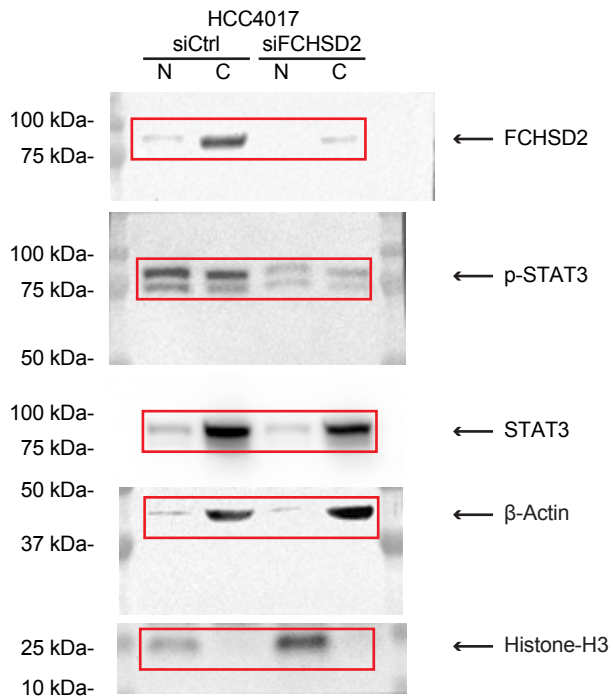

Related to Fig 4A

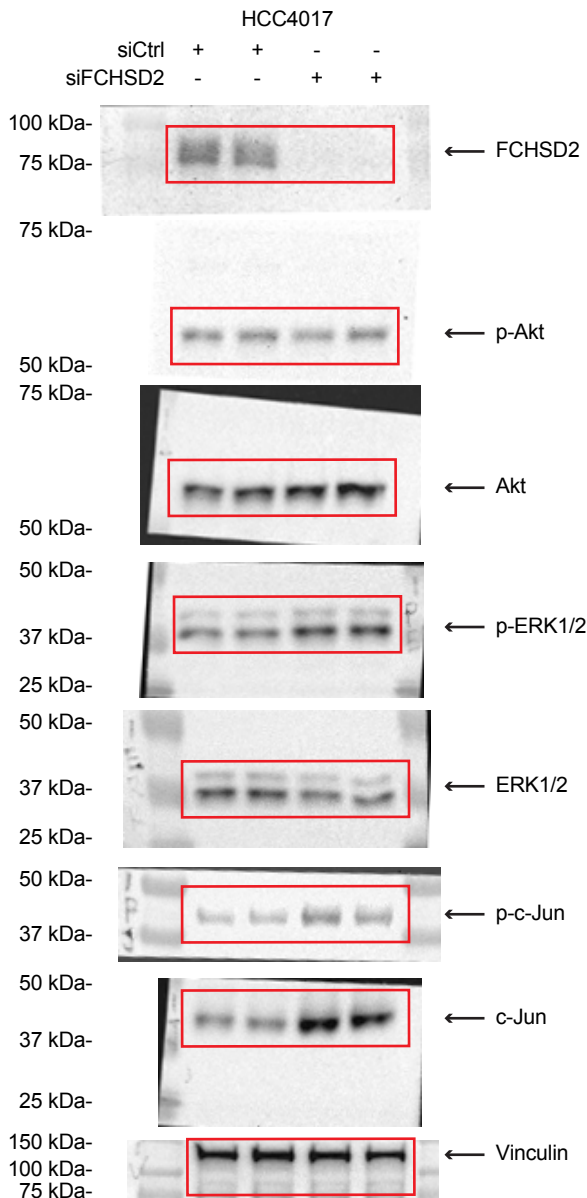

Related to Fig 4D

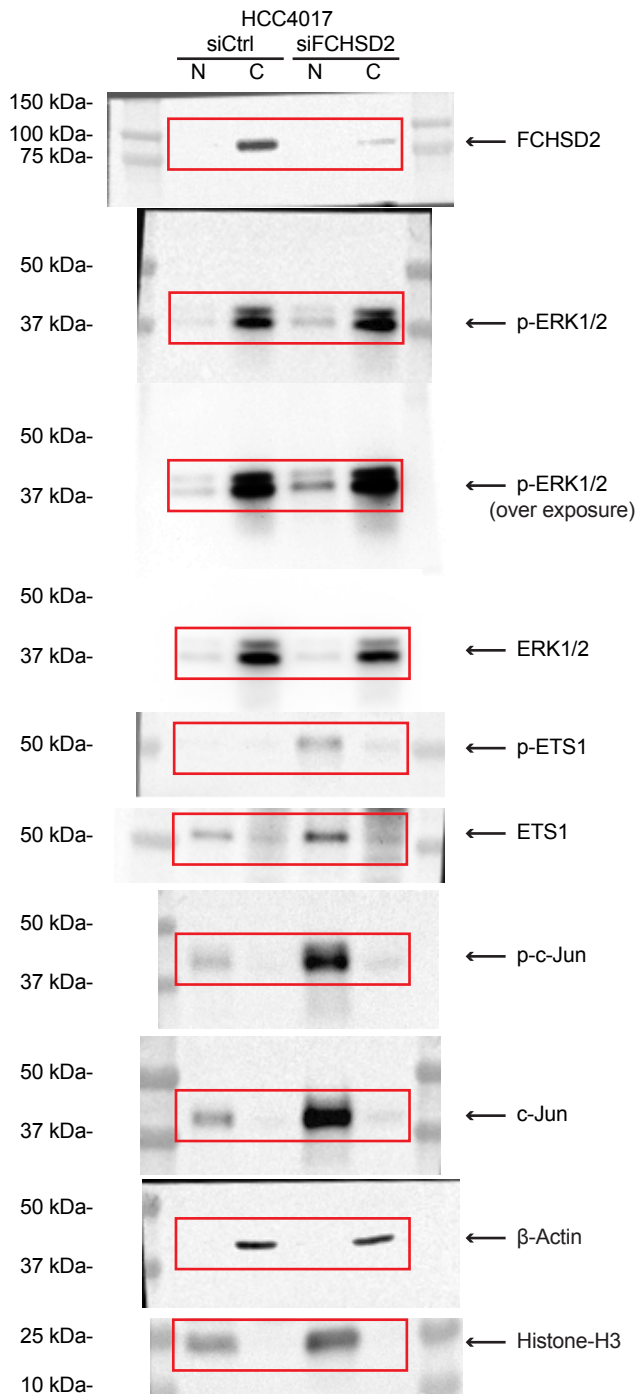

**Related to Fig 4F**

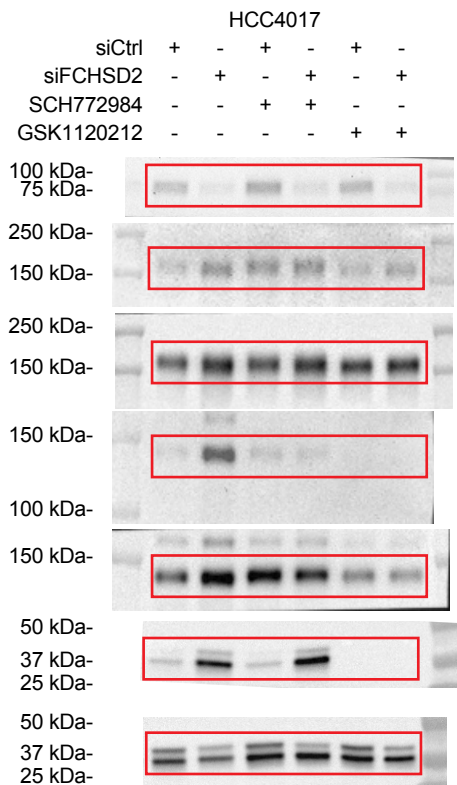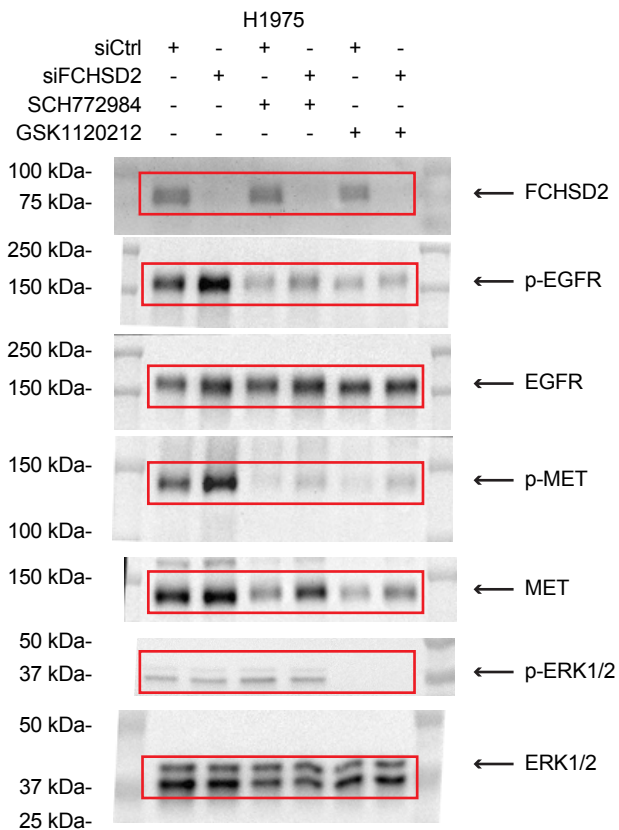

**Related to Fig 5B**

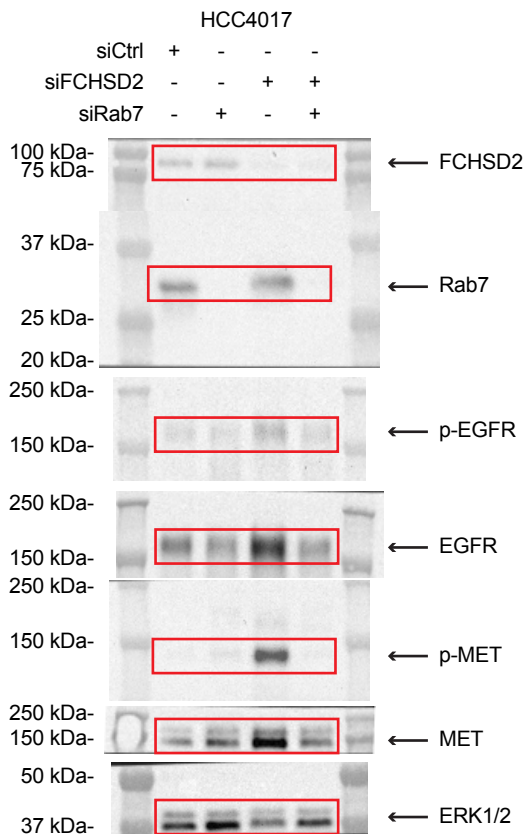

**Related to Fig 5C**

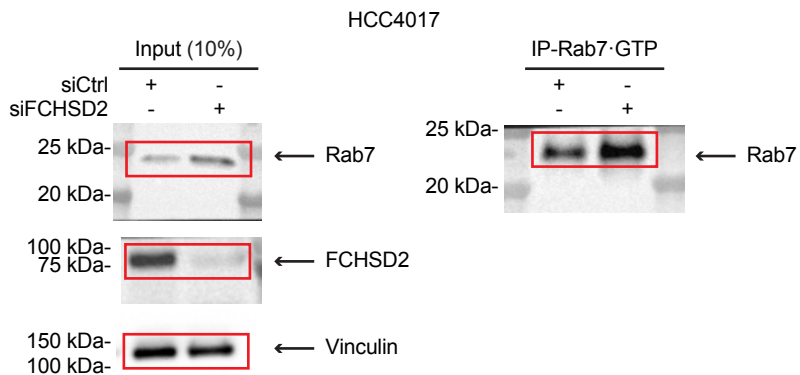

**Related to S2A Fig**

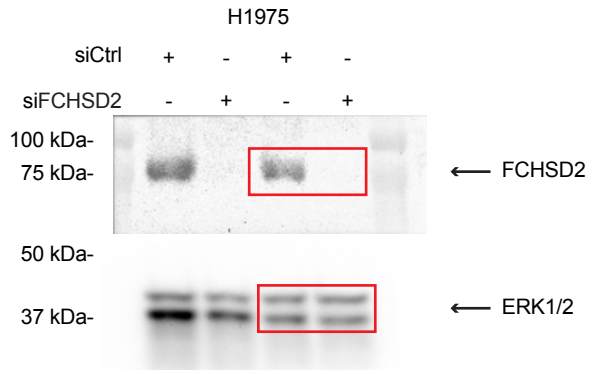



**Related to S5 Fig**

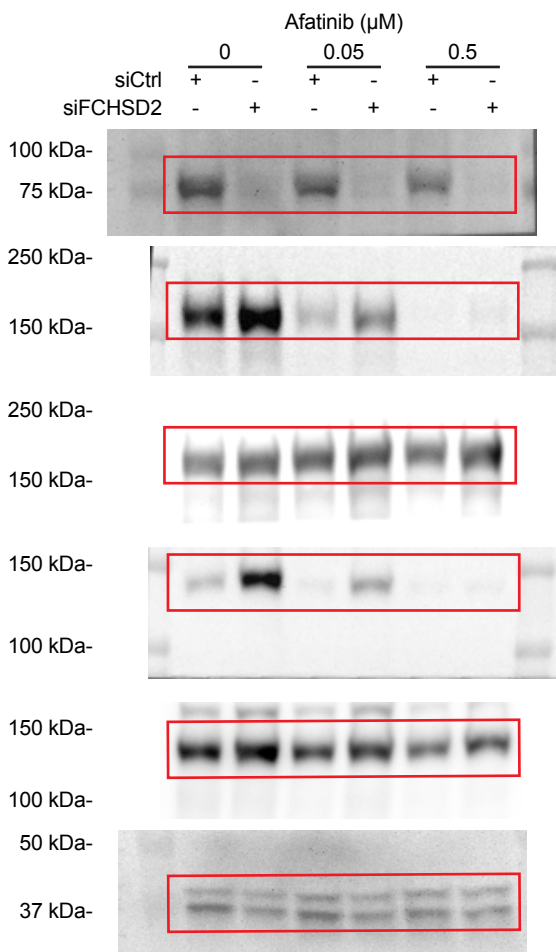

**H1975**

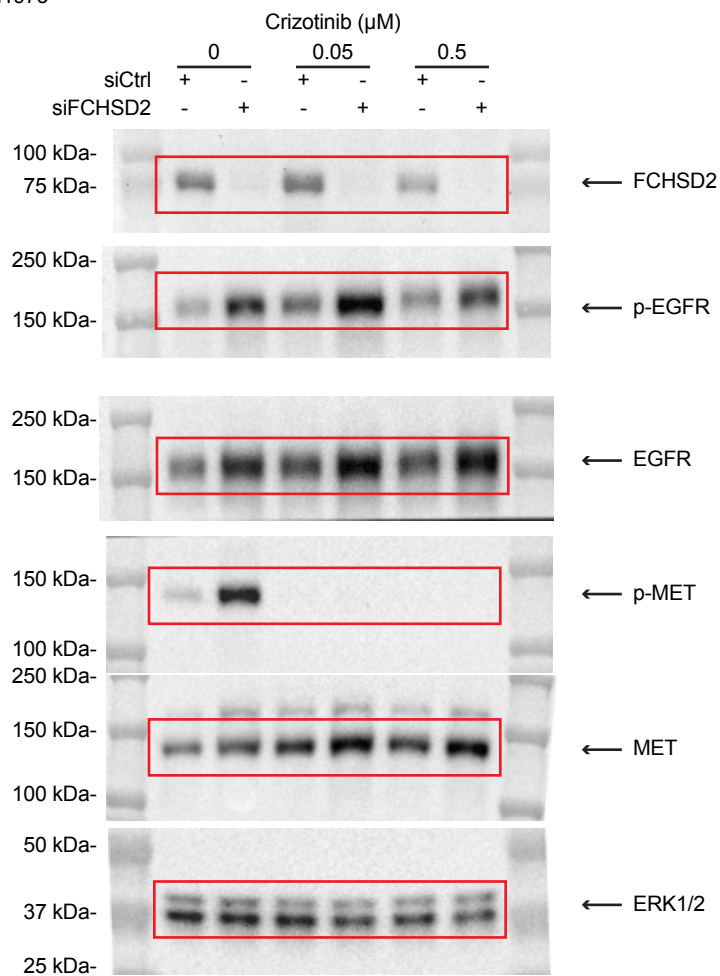

**Related to S6 Fig**

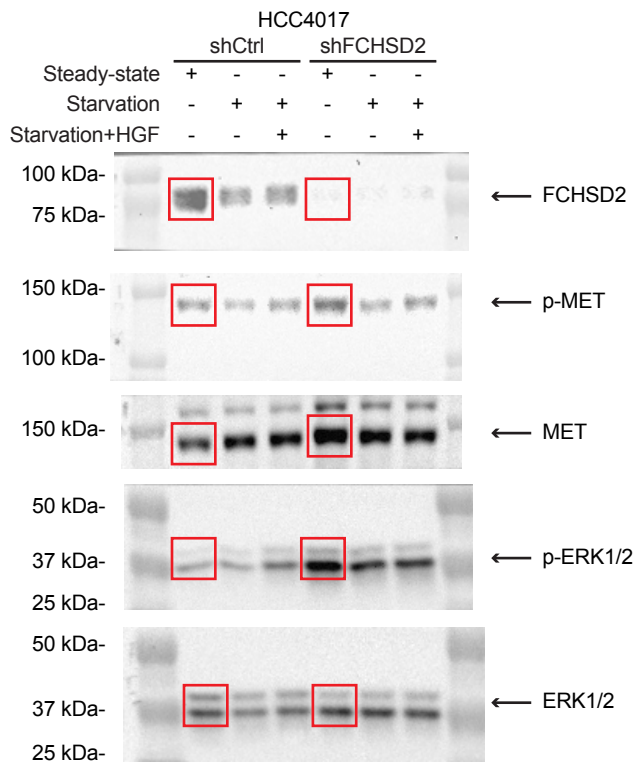

Related to S7 Fig

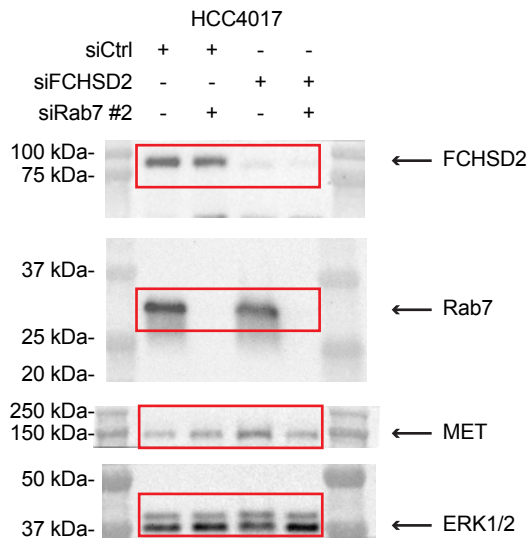

Supplement: pbio.3000778.s002.pdf [file pbio.3000778.s002.pdf]
